# Supplementary material for: Amyloid-β fibril disruption by C60—molecular guidance for rational drug design
Source: Royal Society of Chemistry journal article supplement (doi:10.1039/c2cp40680b), 2012-01-01
Supplement: c2cp40680b.pdf [file c2cp40680b.pdf]

# Supplementary Information to Amyloid- $\beta$ Fibril Disruption by C<sub>60</sub> — Molecular Guidance for Rational Drug Design

Sebastián A. Andujar <sup>a</sup>, Francesca Lugli <sup>b</sup>, Siegfried Höfinger <sup>bc\*</sup>,  
Ricardo D. Enriz <sup>a</sup> and Francesco Zerbetto <sup>b\*</sup>

---

\*Corresponding authors.

<sup>a</sup> Facultad de Química, Bioquímica y Farmacia, Universidad Nacional de San Luis  
Chacabuco 917, 5700 San Luis, Argentina, IMIBIO-CONICET

<sup>b</sup> Dipartimento di Chimica “G. Ciamician”, Università di Bologna  
40126 Bologna, Italy

Fax: +39 051 209 9456

Tel: +39 051 209 9578

E-mail: siegfried.hoefinger@unibo.it, francesco.zerbetto@unibo.it

<sup>c</sup> Department of Physics, Michigan Technological University

49931 Houghton, MI, USA

E-mail: shoefing@mtu.edu

Table I: Partial contributions to the binding free energy,  $\Delta G^{bind}$ , following MM/PBSA analysis of  $C_{60}/A\beta$ -pentamer complexes in type I - III coordination ( $\Delta$  refers to Complex  $-(A\beta)_{5,isolated} - C_{60,isolated}$ ).

| Coordination     | $\Delta MM^{vdW}$<br>$\left[\frac{kcal}{mol}\right]$ | $\Delta MM^{Eel}$<br>$\left[\frac{kcal}{mol}\right]$ | $\Delta PB$<br>$\left[\frac{kcal}{mol}\right]$ | $\Delta \gamma_{eff} SA^{(a)}$<br>$\left[\frac{kcal}{mol}\right]$ | $\Delta G^{bind}$<br>$\left[\frac{kcal}{mol}\right]$ |
|------------------|------------------------------------------------------|------------------------------------------------------|------------------------------------------------|-------------------------------------------------------------------|------------------------------------------------------|
| Type I Complex   | -49.21                                               | -0.16                                                | 16.55                                          | -2.56                                                             | -35.38                                               |
| Type II Complex  | -43.72                                               | -0.17                                                | 11.57                                          | -2.64                                                             | -34.95                                               |
| Type III Complex | -67.40                                               | -0.14                                                | 13.21                                          | -3.18                                                             | -57.51                                               |

<sup>(a)</sup> effective surface tension  $\times$  surface area

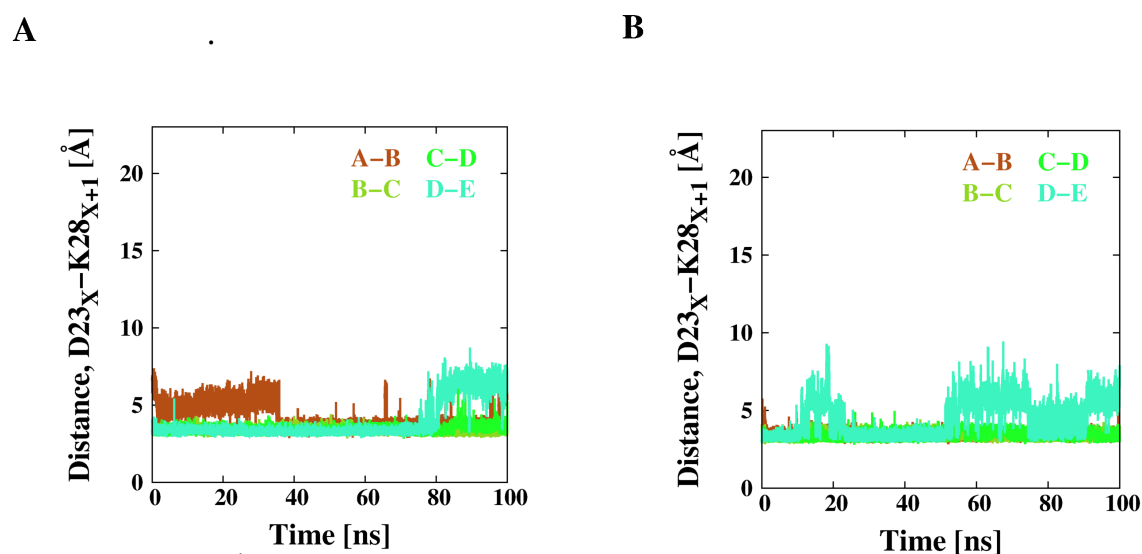

Figure I: **Inter-chain salt bridge between residues  $D23_X$  and  $K28_{X+1}$**  (A) Maintenance of the inter-chain salt bridge between residues  $D23_X$  and  $K28_{X+1}$  as observed during 100 ns of MD simulation of the wt  $A\beta$  pentamer (colors as in Fig 4A of the parent document). (B) Maintenance of the inter-chain salt bridge between residues  $D23_X$  and  $K28_{X+1}$  as observed during 100 ns of MD simulation of the complex  $C_{60}/A\beta$  pentamer (type III coordination, colors as in Fig 4A of the parent document). Little variation is seen thus indicating overall stability and maintenance of the inter-chain salt bridge in either system.
